# Supplementary material for: Alkene reactions with superoxide radical anions in flow electrochemistry
Source: Royal Society of Chemistry journal article supplement (doi:10.1039/d3fd00050h), 2023-01-01
Supplement: d3fd00050h1.pdf [file d3fd00050h1.pdf]

## Supporting Information

### Alkene reactions with superoxide radical anions in flow electrochemistry

Rojan Ali, Tuhin Patra and Thomas Wirth\*

#### Table of Contents:

|                                               |     |
|-----------------------------------------------|-----|
| <b>General Information</b> .....              | S2  |
| <b>General Procedures</b> .....               | S4  |
| <b>Optimisation Studies</b> .....             | S5  |
| <b>Characterisation of the Products</b> ..... | S15 |
| <b>NMR Spectra</b> .....                      | S17 |
| <b>References</b> .....                       | S19 |

## General Information

### General:

All chemicals were purchased from Acros Organics, Alfa Aesar, Apollo Scientific Ltd, Fisher Scientific Ltd, Scientific Laboratory Supplies Ltd, Merck KGaA, Fluorochem Ltd, and Sigma-Aldrich. All purchased chemicals were used without further purification. Deuterated solvents for NMR analysis were purchased from Sigma-Aldrich. Room temperature (rt) stands for 20-25 °C. Thin layer chromatography (TLC) experiments were performed on aluminum plates coated with silica (TLC Silica gel 60 F<sub>254</sub>) purchased from Merck, and visualised by UV light. Flash column chromatography was carried out on a Biotage® Isolera™ Four system using Biotage® Sfär Silica HC D 10 g cartridges.

### NMR:

<sup>1</sup>H NMR and <sup>13</sup>C NMR spectra were recorded at 298 K on a Bruker Fourier 300 MHz, Bruker DPX 400 MHz, or Bruker Avance 500 MHz instrument and were referenced relative to the residual solvent peaks (<sup>1</sup>H: CDCl<sub>3</sub>, δ 7.26 ppm; <sup>13</sup>C: CDCl<sub>3</sub>, δ 77.16 ppm). Chemical shifts are reported in ppm (δ). The spectra reported use the following abbreviations to express multiplicities: s = singlet, m = multiplet. The coupling constants (J) are expressed in Hertz (Hz).

### HRMS:

High resolution mass spectra were obtained from Cardiff University on a Waters GC-TOF spectrometer. Ions were generated using electron ionisation (EI) techniques. All signals are reported with a mass-to-charge (*m/z*) ratio unit.

### GC-FID:

Gas chromatography with flame ionisation detector (GC-FID) was performed on an Agilent 7890A GC system fitted with a Restek Rt-βDEXsm column (30 m × 0.25 mm ID) for optimisation, using benzonitrile as an internal standard.

### GC-MS:

GC-MS spectra were recorded on a PerkinElmer Clarus 680 GC and a PerkinElmer Clarus SQ 8C MS fitted with a PerkinElmer Elite-1 100% dimethyl polysiloxane column (30 m × 0.25 mm ID).

### Electrolysis:

Flow electrochemical experiments were performed using a stand-alone Vapourtec Ion Electrochemical Reactor, with an Aim-TTi EX354RD Dual Power Supply from Thurlby Thandar Instruments Ltd. Chemyx Fusion 100 Touch Syringe Pumps, a Vapourtec SF-10

Reagent Pump, a Vapourtec tuneable back pressure regulator (BPR), and an Omega FMA5500A series mass flow controller were used in the flow set-ups. Electrode materials employed were platinum (Pt) purchased from Goodfellow. The electrodes ( $5 \times 5 \text{ cm}^2$ ) were separated by a 0.5 mm FEP spacer resulting in a reactor volume of 0.6 mL, with an exposed electrode surface area of  $12 \text{ cm}^2$ .

**Melting points:**

Melting points were measured using a Gallenkamp variable heater with samples in open capillary tubes and are uncorrected.

## General Procedures

### General Flow Electrolysis Procedure:

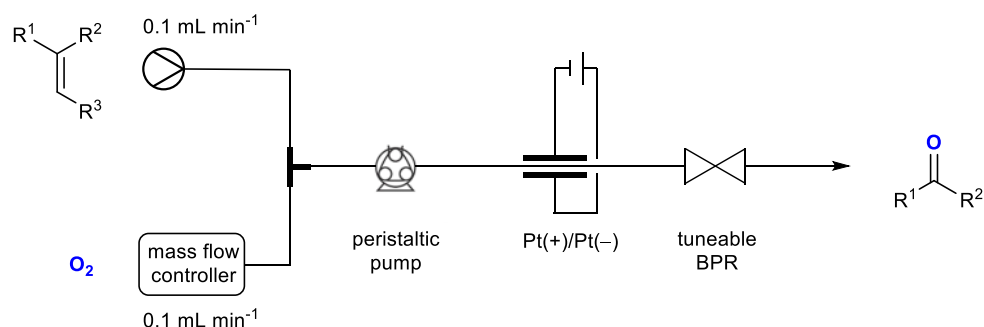

The electrolysis was performed in an undivided cell using a Vapourtec Ion Electrochemical Reactor<sup>1</sup> (FEP spacer = 0.5 mm, reactor volume = 0.6 mL), employing a platinum electrode as the anode and a platinum electrode as the cathode (active surface area = 12 cm<sup>2</sup> for each electrode). A solution of alkene (0.025 M, 1 equiv.) and <sup>n</sup>Bu<sub>4</sub>NClO<sub>4</sub> (0.05 M, 2 equiv.) in isobutyronitrile was pumped with a flow rate of 0.1 mL min<sup>-1</sup>, which combined at a T-piece with molecular oxygen flown through a mass flow controller at 0.1 mL min<sup>-1</sup>.<sup>2</sup> The resulting biphasic system was pumped by use of a peristaltic pump<sup>3</sup> with a flow rate of 0.2 mL min<sup>-1</sup> into the electrochemical reactor, and was electrolysed under pressurised conditions by use of a tuneable back pressure regulator at constant current conditions (16 mA, 2 F). The first one and a half reactor volumes were disposed to ensure a steady state of the system had been reached. After collection for a known period, the reaction mixture was treated with distilled water and the aqueous phase was extracted with dichloromethane (3 × 25 mL). The organic layers were combined, dried over MgSO<sub>4</sub>, filtered, and the solvent was removed *in vacuo* to yield the crude product. The crude product was purified by flash column chromatography.

## Optimisation Studies

### Optimisation reactions:

**Table S1:** Set-up I optimisation.

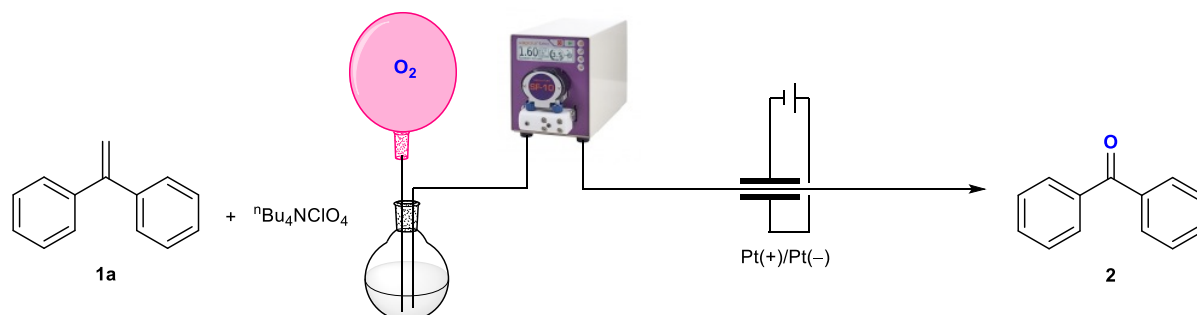

| Entry | Flow rate ( $\text{mL min}^{-1}$ ) | Current (mA) | Charge (F) | Yield <b>2</b> (%) |
|-------|------------------------------------|--------------|------------|--------------------|
| 1     | 0.1                                | 24           | 3          | -                  |
| 2     | 0.1                                | 32           | 4          | 2                  |
| 3     | 0.1                                | 40           | 5          | 2                  |
| 4     | 0.05                               | 12           | 3          | 5                  |
| 5     | 0.05                               | 16           | 4          | 6                  |

**a** Standard reaction conditions: undivided flow cell, Pt anode (active surface area:  $12 \text{ cm}^2$ ), Pt cathode, interelectrode distance: 0.5 mm, **1a** (0.05 M, 1 equiv.) and  $t\text{Bu}_4\text{NClO}_4$  (0.05 M) in MeCN sat. with  $\text{O}_2$ . **b** Yield determined by GC-FID using benzonitrile as internal standard.

**Table S2:** Set-up II optimisation for flow rate.

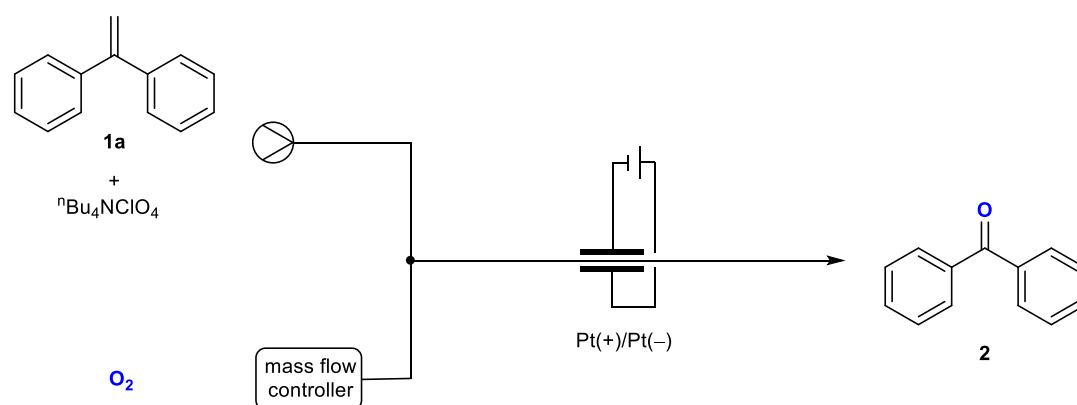

| Entry    | Flow rate ( $\text{mL min}^{-1}$ ) | Current (mA) | Charge (F) | Yield <b>2</b> (%) |
|----------|------------------------------------|--------------|------------|--------------------|
| 1        | 0.2                                | 32           | 2          | 9                  |
| <b>2</b> | <b>0.1</b>                         | <b>16</b>    | <b>2</b>   | <b>26</b>          |
| 3        | 0.05                               | 8            | 2          | 30                 |

**a** Standard reaction conditions: undivided flow cell, Pt anode (active surface area: 12 cm<sup>2</sup>), Pt cathode, interelectrode distance: 0.5 mm, **1a** (0.05 M, 1 equiv.) and <sup>n</sup>Bu<sub>4</sub>NClO<sub>4</sub> (0.05 M) in MeCN sat. with O<sub>2</sub>. **b** Yield determined by GC-FID using benzonitrile as internal standard.

**Table S3:** Set-up II optimisation for charge.

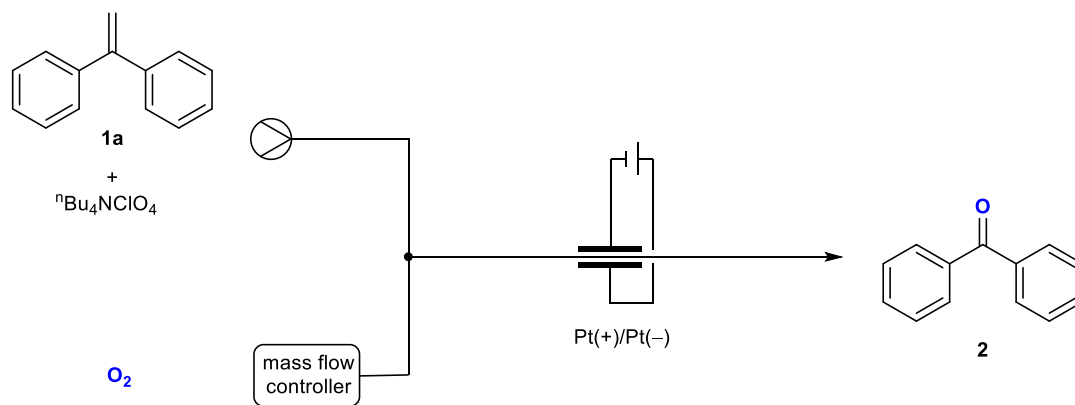

| Entry    | Flow rate (mL min <sup>-1</sup> ) | Current (mA) | Charge (F) | Yield <b>2</b> (%) |
|----------|-----------------------------------|--------------|------------|--------------------|
| 1        | 0.1                               | 32           | 4          | 5                  |
| 2        | 0.1                               | 24           | 3          | 14                 |
| <b>3</b> | <b>0.1</b>                        | <b>16</b>    | <b>2</b>   | <b>26</b>          |
| 4        | 0.1                               | 8            | 1          | 13                 |

**a** Standard reaction conditions: undivided flow cell, Pt anode (active surface area: 12 cm<sup>2</sup>), Pt cathode, interelectrode distance: 0.5 mm, **1a** (0.05 M, 1 equiv.) and <sup>n</sup>Bu<sub>4</sub>NClO<sub>4</sub> (0.05 M) in MeCN. **b** Yield determined by GC-FID using benzonitrile as internal standard.

**Table S4:** Set-up III optimisation.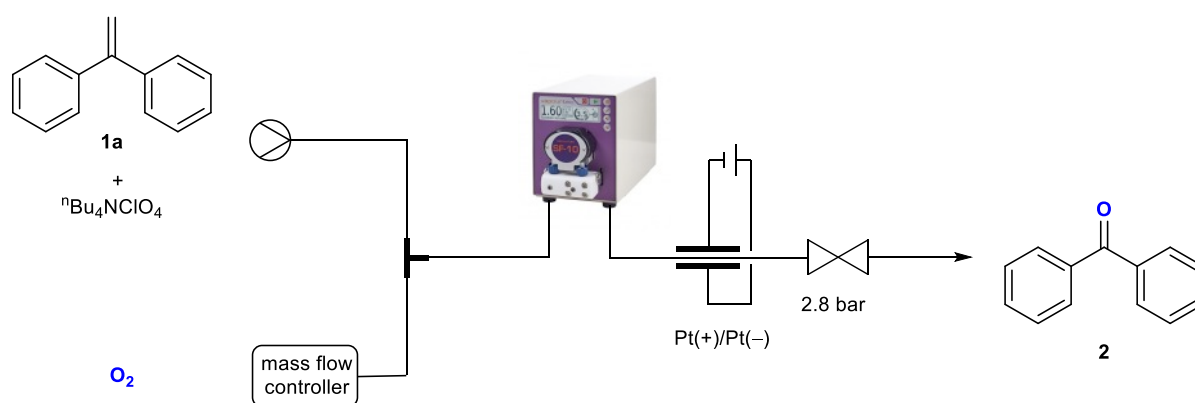

| Entry    | Flow rate ( $\text{mL min}^{-1}$ ) | Current (mA) | Charge (F) | Yield <b>2</b> (%) |
|----------|------------------------------------|--------------|------------|--------------------|
| 1        | 0.1                                | 16           | 2          | 25                 |
| 2        | 0.1                                | 24           | 3          | 21                 |
| <b>3</b> | <b>0.05</b>                        | <b>8</b>     | <b>2</b>   | <b>29</b>          |
| 4        | 0.05                               | 12           | 3          | 27                 |

**a** Standard reaction conditions: undivided flow cell, Pt anode (active surface area:  $12 \text{ cm}^2$ ), Pt cathode, interelectrode distance: 0.5 mm, **1a** (0.05 M, 1 equiv.) and  $n\text{Bu}_4\text{NClO}_4$  (0.05 M) in MeCN. **b** Yield determined by GC-FID using benzonitrile as internal standard.

**Table S5:** Optimisation of anodic material.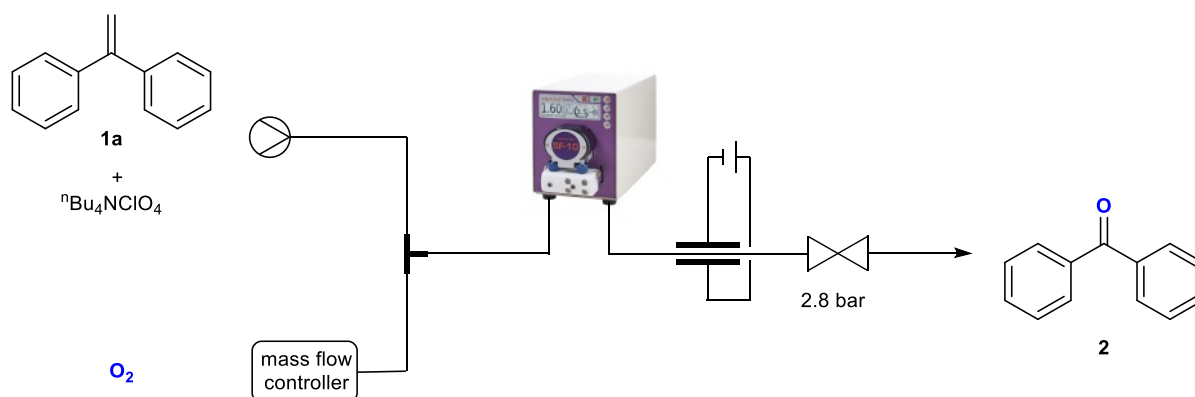

| Entry | Anode | Flow rate ( $\text{mL min}^{-1}$ ) | Current (mA) | Charge (F) | Yield <b>2</b> (%) |
|-------|-------|------------------------------------|--------------|------------|--------------------|
| 1     | Gr    | 0.1                                | 16           | 2          | 17                 |
| 2     | Pt    | 0.1                                | 16           | 2          | 25                 |
| 3     | Gr    | 0.05                               | 8            | 2          | 21                 |
| 4     | Pt    | 0.05                               | 8            | 2          | 29                 |

**a** Standard reaction conditions: undivided flow cell, x anode (active surface area: 12 cm<sup>2</sup>), Pt cathode, interelectrode distance: 0.5 mm, **1a** (0.05 M, 1 equiv.) and <sup>n</sup>Bu<sub>4</sub>NClO<sub>4</sub> (0.05 M) in MeCN. **b** Yield determined by GC-FID using benzonitrile as internal standard.

**Table S6:** Optimisation of concentration.

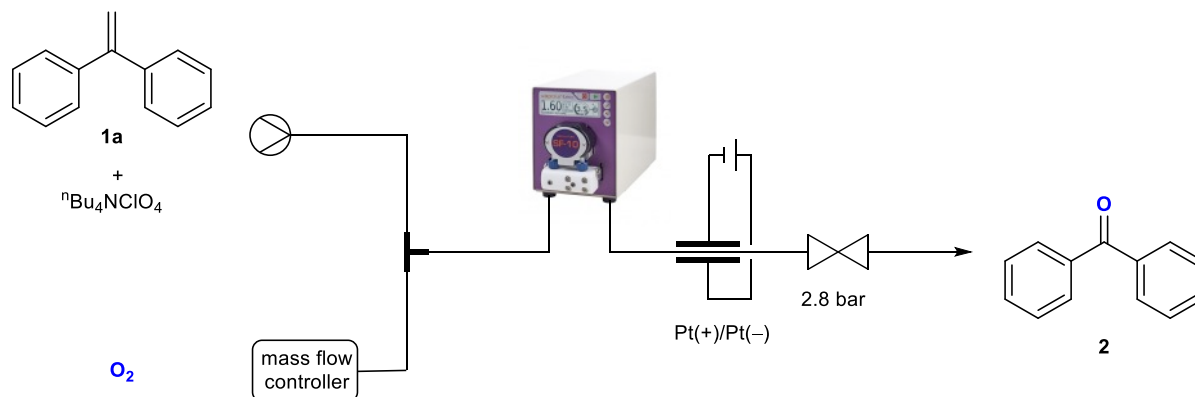

| Entry | [ <b>1a</b> ] <sub>0</sub> (M) | Flow rate (mL min <sup>-1</sup> ) | Current (mA) | Charge (F) | Yield <b>2</b> (%) |
|-------|--------------------------------|-----------------------------------|--------------|------------|--------------------|
| 1     | 0.025                          | 0.1                               | 12           | 3          | 25                 |
| 2     | 0.05                           | 0.1                               | 24           | 3          | 21                 |
| 3     | 0.025                          | 0.05                              | 6            | 3          | 33                 |
| 4     | 0.05                           | 0.05                              | 12           | 3          | 27                 |

**a** Standard reaction conditions: undivided flow cell, Pt anode (active surface area: 12 cm<sup>2</sup>), Pt cathode, interelectrode distance: 0.5 mm, **1a** (x M, 1 equiv.) and <sup>n</sup>Bu<sub>4</sub>NClO<sub>4</sub> (0.05 M) in MeCN. **b** Yield determined by GC-FID using benzonitrile as internal standard.

**Table S7:** Optimisation of cathodic material.

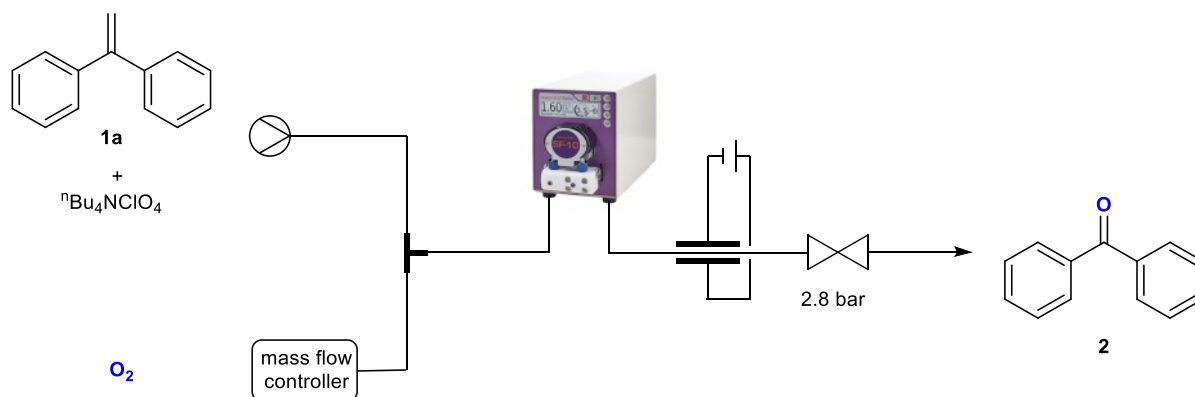



| Entry | Cathode | Current (mA) | Charge (F) | Yield <b>2</b> (%) |
|-------|---------|--------------|------------|--------------------|
| 1     | Cu      | 16           | 2          | 26                 |
| 2     | Ni      | 16           | 2          | 25                 |
| 3     | Zn      | 16           | 2          | 26                 |
| 4     | SS      | 16           | 2          | 20                 |
| 5     | Pt      | 16           | 2          | 25                 |

**a** Standard reaction conditions: undivided flow cell, Pt anode (active surface area: 12 cm<sup>2</sup>), cathode, interelectrode distance: 0.5 mm, **1a** (0.05 M, 1 equiv.) and <sup>n</sup>Bu<sub>4</sub>NClO<sub>4</sub> (0.05 M) in MeCN, combined flow rate: 0.1 mL min<sup>-1</sup>. **b** Yield determined by GC-FID using benzonitrile as internal standard.

**Table S8:** Optimisation of solvent composition.

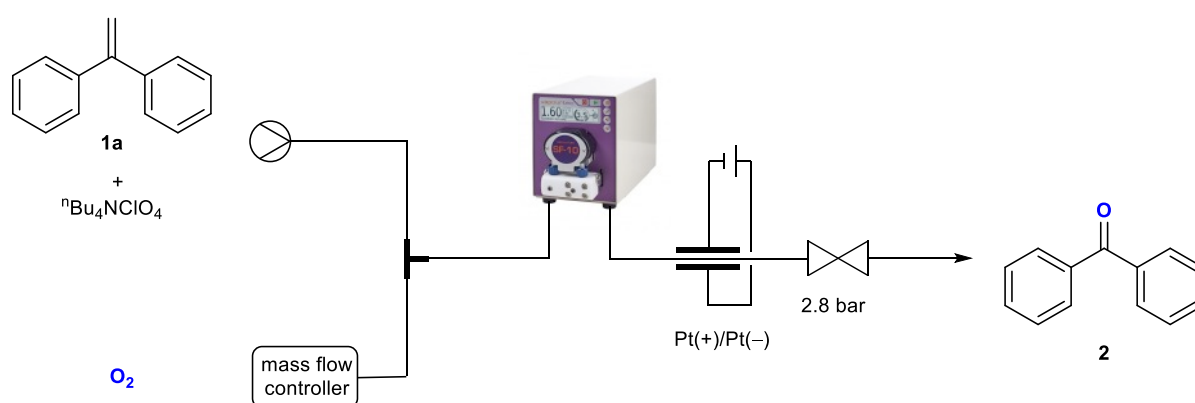

| Entry    | Solvent             | Current (mA) | Charge (F) | Yield <b>2</b> (%) |
|----------|---------------------|--------------|------------|--------------------|
| 1        | THF                 | 12           | 3          | 6                  |
| 2        | DCM                 | 12           | 3          | 5                  |
| 3        | acetone             | 12           | 3          | 29                 |
| 4        | MeCN                | 12           | 3          | 25                 |
| <b>5</b> | <b><i>i</i>PrCN</b> | <b>12</b>    | <b>3</b>   | <b>36</b>          |

**a** Standard reaction conditions: undivided flow cell, Pt anode (active surface area: 12 cm<sup>2</sup>), Pt cathode, interelectrode distance: 0.5 mm, **1a** (0.025 M, 1 equiv.) and <sup>n</sup>Bu<sub>4</sub>NClO<sub>4</sub> (0.05 M) in solvent, combined flow rate: 0.1 mL min<sup>-1</sup>. **b** Yield determined by GC-FID using benzonitrile as internal standard.

**Table S9:** Set-up IV optimisation for back pressure.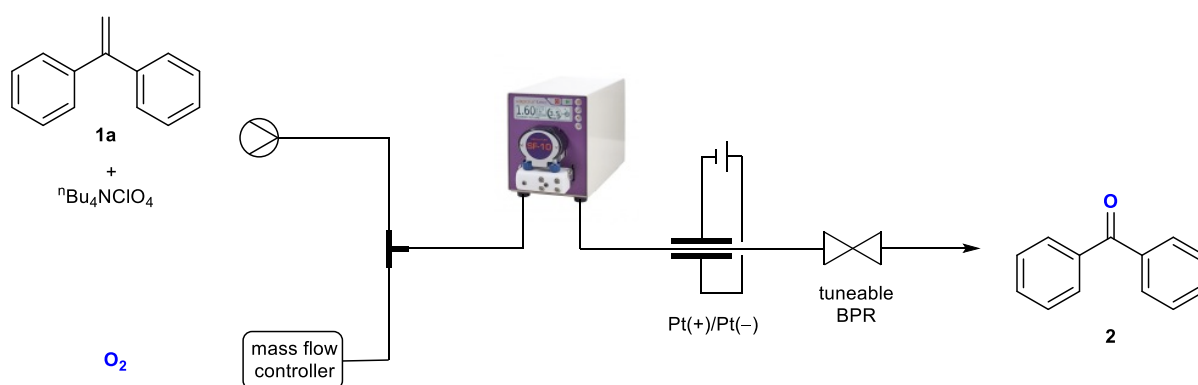

| Entry | Current (mA) | Charge (F) | Back pressure (bar) | Yield <b>2</b> (%) |
|-------|--------------|------------|---------------------|--------------------|
| 1     | 16           | 2          | 0                   | 41                 |
| 2     | <b>16</b>    | <b>2</b>   | <b>1.1</b>          | <b>50</b>          |
| 3     | 16           | 2          | 2.2                 | 51                 |
| 4     | 16           | 2          | 2.8                 | 53                 |

**a** Standard reaction conditions: undivided flow cell, Pt anode (active surface area: 12 cm<sup>2</sup>), Pt cathode, interelectrode distance: 0.5 mm, **1a** (0.025 M, 1 equiv.) and  ${}^n\text{Bu}_4\text{NClO}_4$  (0.05 M) in  $i\text{PrCN}$ , combined flow rate: 0.2 mL min<sup>-1</sup>. **b** Yield determined by GC-FID using benzonitrile as internal standard.

**Table S10:** Set-up IV optimisation for charge.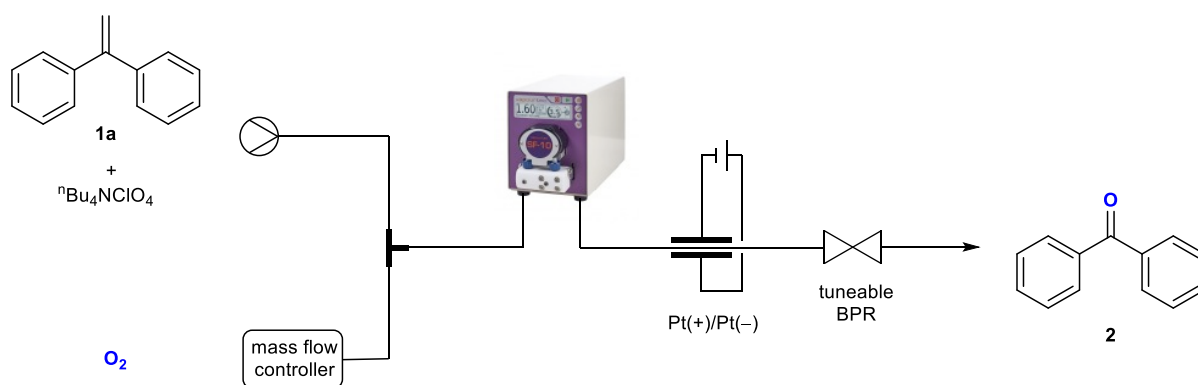

| Entry | Current (mA) | Charge (F) | Back pressure (bar) | Yield <b>2</b> (%) |
|-------|--------------|------------|---------------------|--------------------|
| 1     | <b>16</b>    | <b>2</b>   | <b>1.1</b>          | <b>51</b>          |
| 2     | 20           | 2.5        | 1.1                 | 46                 |
| 3     | 24           | 3          | 1.1                 | 35                 |

**a** Standard reaction conditions: undivided flow cell, Pt anode (active surface area: 12 cm<sup>2</sup>), Pt cathode, interelectrode distance: 0.5 mm, **1a** (0.025 M, 1 equiv.) and <sup>n</sup>Bu<sub>4</sub>NClO<sub>4</sub> (0.05 M) in <sup>4</sup>PrCN, combined flow rate: 0.2 mL min<sup>-1</sup>. **b** Yield determined by GC-FID using benzonitrile as internal standard.

## GC-MS study on side products

Crude GC-MS spectra of reaction  
performed in MeCN

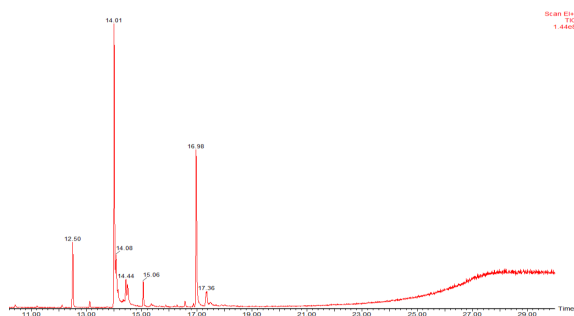

Crude GC-MS spectra of reaction  
performed in *i*PrCN

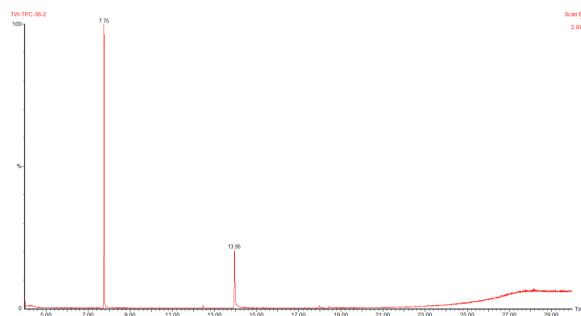

## Electrochemical Flow Equipment

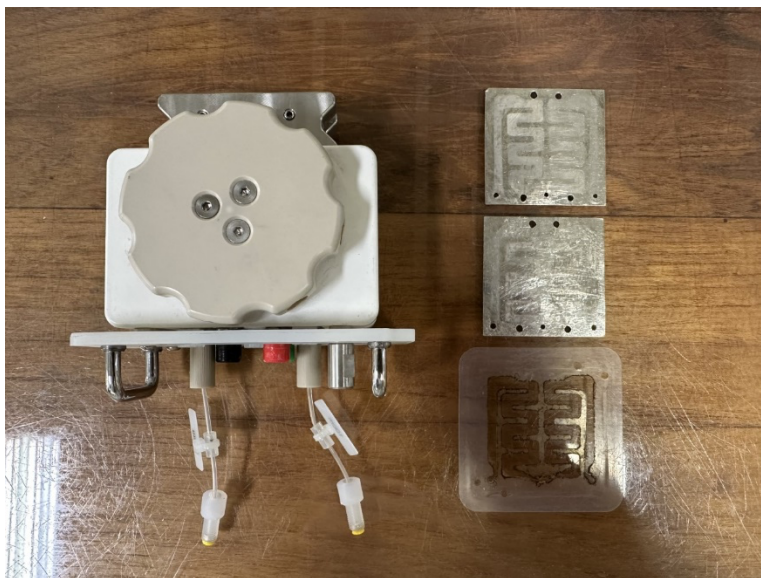

**Figure S1:** A closed Vapourtec Ion Electrochemical Flow Reactor (left), Pt electrode, Pt electrode and 0.5 mm FEP spacer (right).

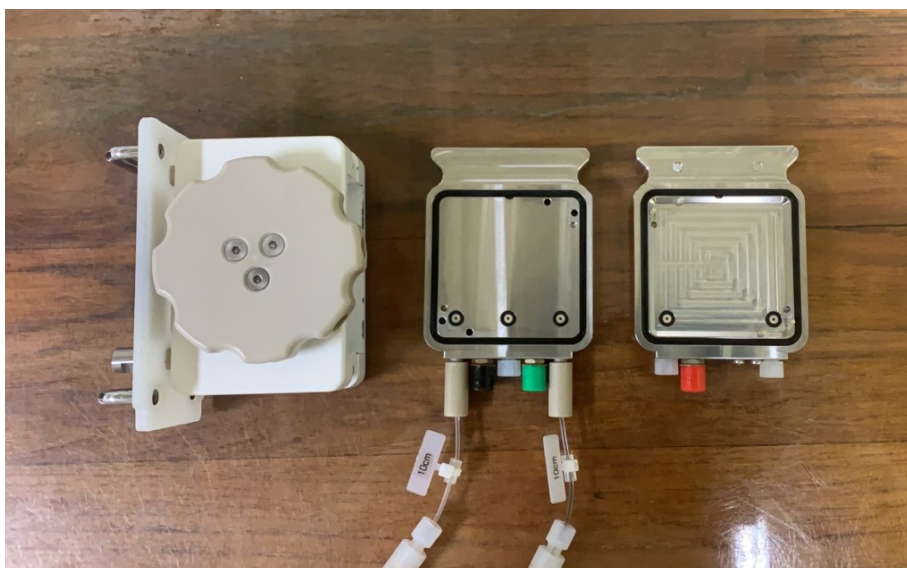

**Figure S2:** An open Vapourtec Ion Electrochemical Flow reactor.

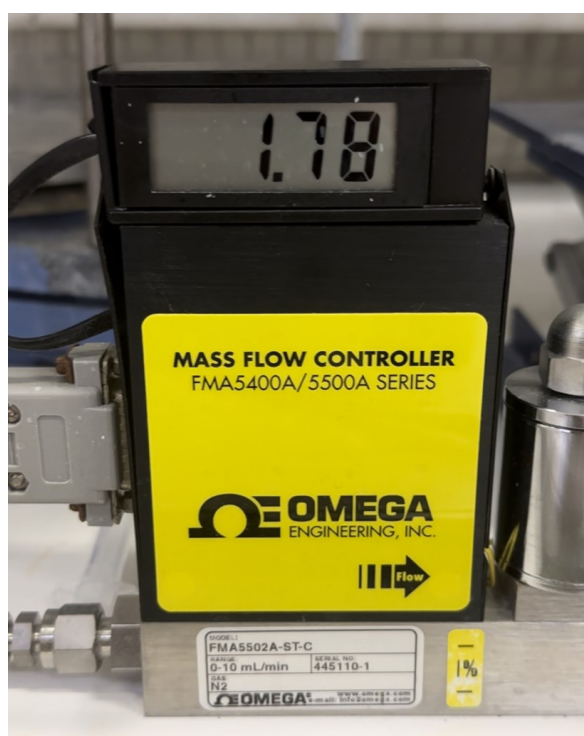

**Figure S3:** An Omega FMA5500A series mass flow controller.

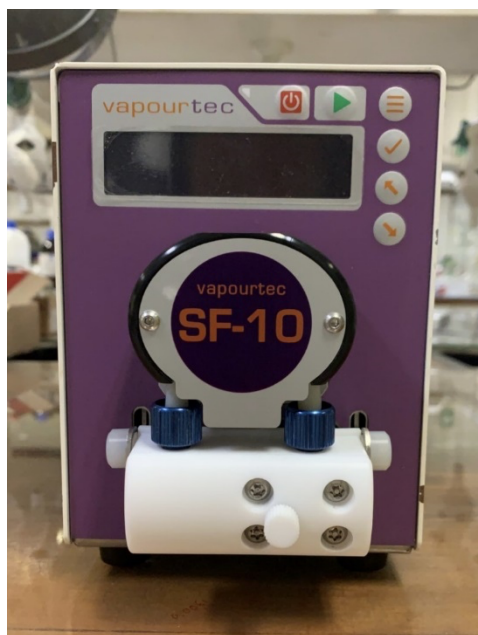

**Figure S4:** Vapourtec SF-10 reagent pump.

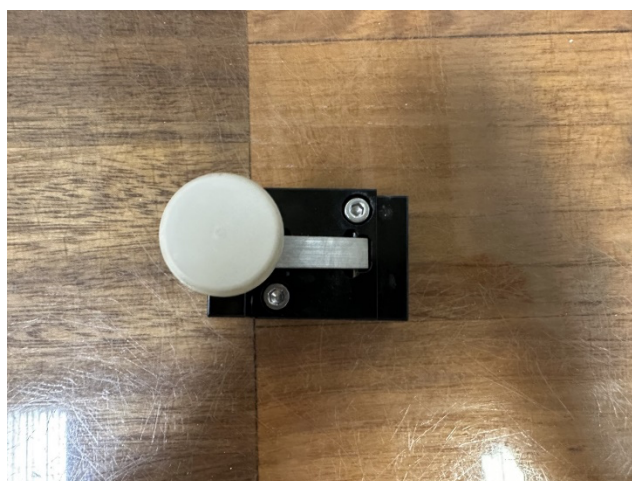

**Figure S5:** Vapourtec tuneable back-pressure regulator.

#### Failed alkenes for oxidative cleavage

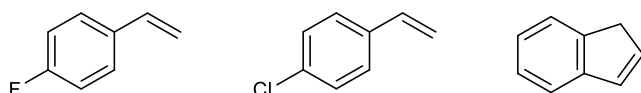

All starting material was consumed for all three substrates following the reaction, however only decomposition products were detected by  $^1\text{H}$  NMR and  $^{13}\text{C}$  NMR analysis.

## Characterisation of the Products

### Benzophenone (2)

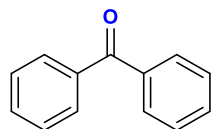

Prepared according to the general procedure **A** from 1,1-diphenylethylene **1a** (68 mg, 0.375 mmol) over 2.5 h. The crude product was purified by flash column chromatography on silica gel (EtOAc:cyclohexane = 1:19) to give **2** as a colourless solid (30 mg, 0.17 mmol, 45%).

$^1\text{H NMR}$  (500 MHz,  $\text{CDCl}_3$ ):  $\delta$  7.82-7.80 (m, 4H), 7.61-7.57 (m, 2H), 7.50-7.47 (m, 4H).

$^{13}\text{C NMR}$  (126 MHz,  $\text{CDCl}_3$ ):  $\delta$  196.9, 137.7, 132.5, 130.2, 128.4.

**HRMS (EI)**:  $m/z$   $[\text{M}]^+$  calcd for  $\text{C}_{13}\text{H}_{10}\text{O}$  182.07262, found 182.0722.

**mp**: 48–51 °C.

NMR data is identical to the literature data.<sup>4</sup>

### Benzophenone (2)

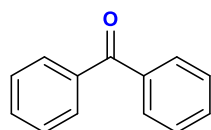

Prepared according to the general procedure **A** from 1,1-diphenyl-1-pentene **1b** (83 mg, 0.375 mmol) over 2.5 h. The crude product was purified by flash column chromatography on silica gel (EtOAc:cyclohexane = 1:19) to give **2** as a white solid (23 mg, 0.12 mmol, 33%).

### Benzophenone (2)

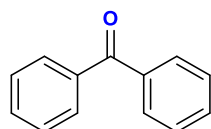

Prepared according to the general procedure **A** from 1,1,2-triphenylethene **1c** (96 mg, 0.38 mmol) over 2.5 h. The crude product was purified by flash column chromatography on silica gel (EtOAc:cyclohexane = 1:19) to give **2** as a white solid (18 mg, 0.10 mmol, 27%).

### Acetophenone (**3**)

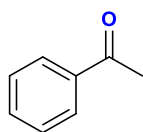

Prepared according to the general procedure **A** from  $\alpha$ -methylstyrene **1d** (59 mg, 0.50 mmol) over 3.33 h. The crude product was purified by column chromatography on silica gel (EtOAc:cyclohexane = 1:19) to give **3** as a clear oil (24 mg, 0.20 mmol, 39%).

**$^1\text{H}$  NMR (500 MHz,  $\text{CDCl}_3$ ):**  $\delta$  7.97-7.95 (m, 2H), 7.58-7.54 (m, 1H), 7.48-7.44 (m, 2H), 2.60 (s, 3H).

**$^{13}\text{C}$  NMR (126 MHz,  $\text{CDCl}_3$ ):**  $\delta$  198.3, 137.2, 133.2, 128.7, 128.4, 26.7.

**HRMS (EI):**  $m/z$   $[\text{M}]^+$  calcd for  $\text{C}_8\text{H}_8\text{O}$  120.05697, found 120.0569.

NMR data is identical to the literature data.<sup>4</sup>



## NMR Spectra

### <sup>1</sup>H NMR of benzophenone (2)

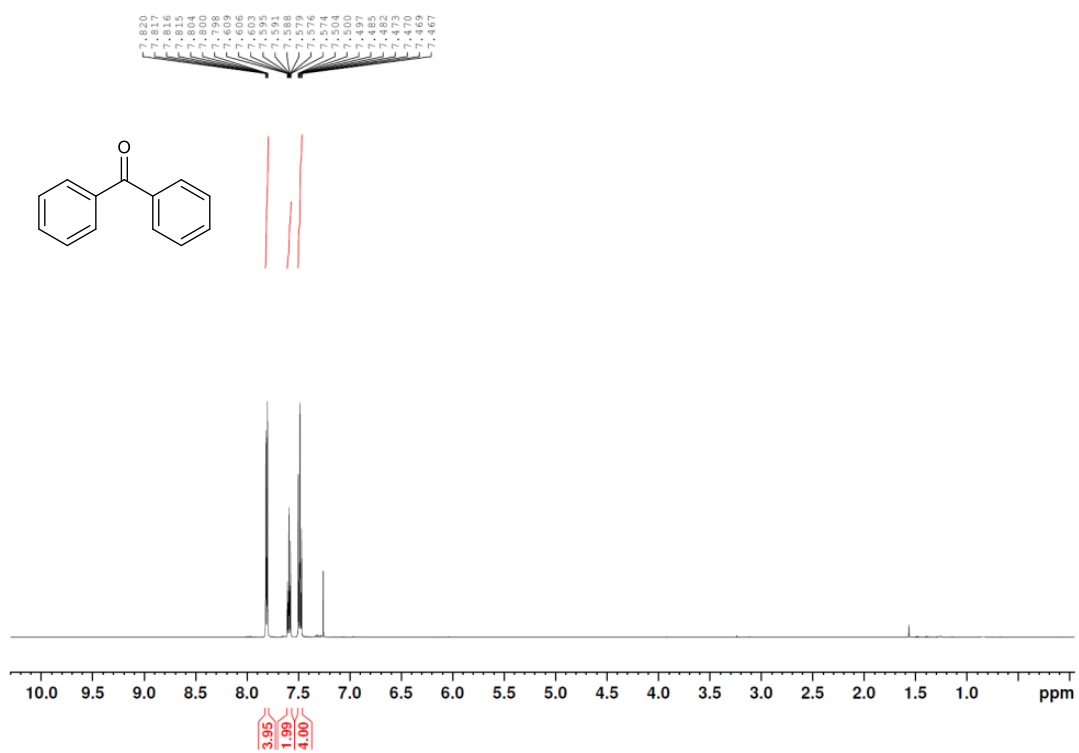

### <sup>13</sup>C NMR of benzophenone (2)

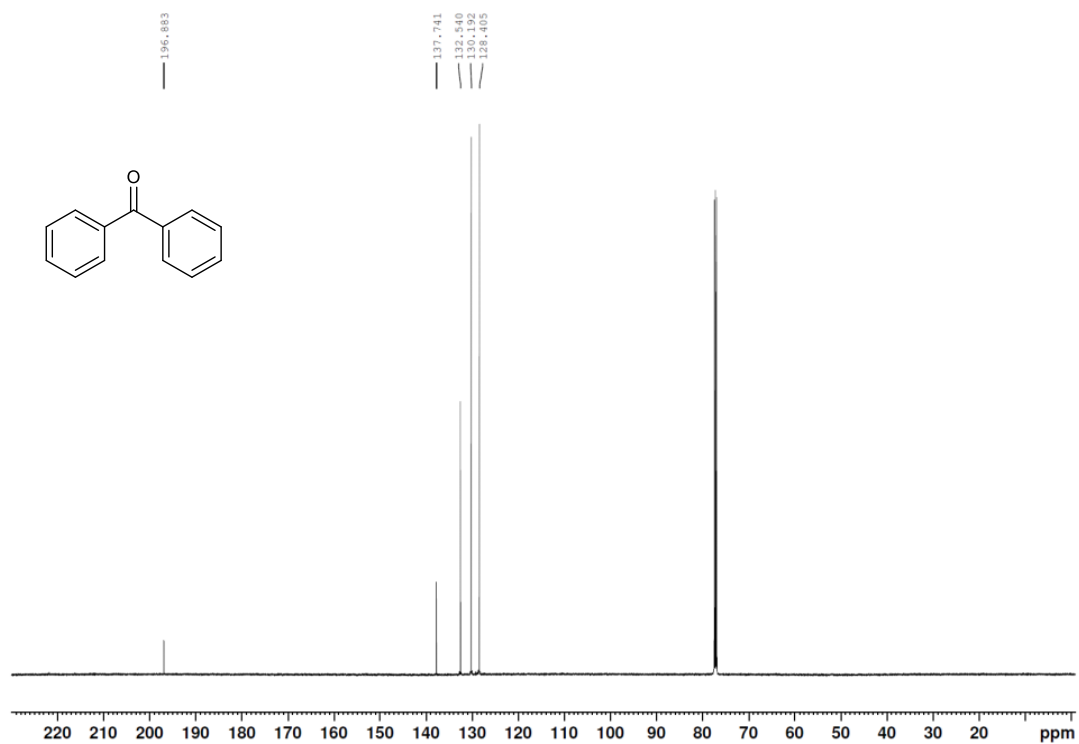

### <sup>1</sup>H NMR of acetophenone (3)

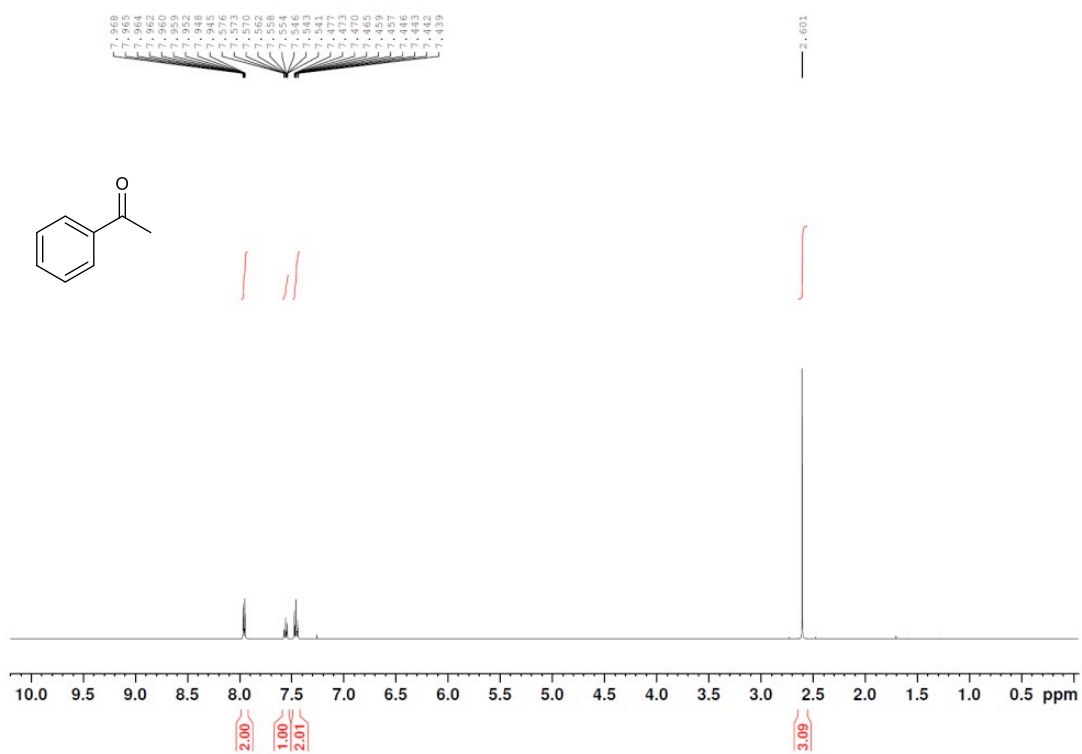

### <sup>13</sup>C NMR of acetophenone (3)

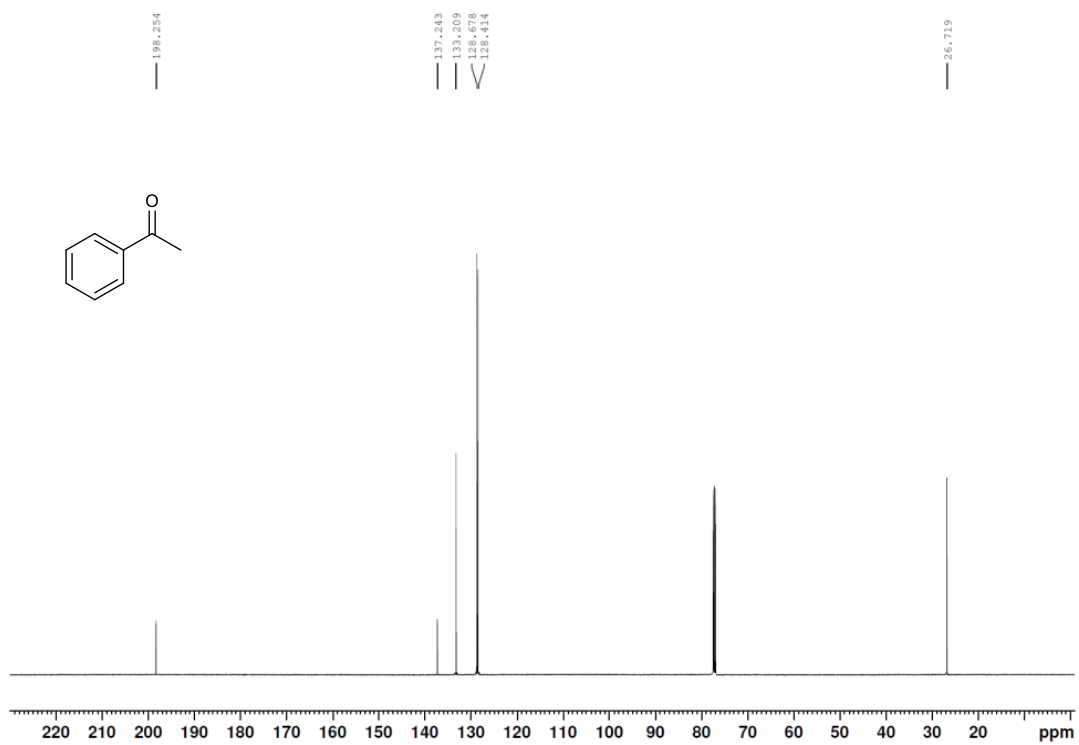

## References

1. Ion stand-alone electrochemical reactor, <https://www.vapourtec.com/products/flow-reactors/ion-stand-alone-electrochemical-reactor/> (accessed February 2023).
2. Gas Mass flowmeter and controllers, [https://www.omega.co.uk/pptst/FMA5400A\\_5500A.html](https://www.omega.co.uk/pptst/FMA5400A_5500A.html) (accessed February 2023).
3. SF-10 reagent pump features, <https://www.vapourtec.com/products/sf-10-pump-features/> (accessed February 2023).
4. Y. Imada, Y. Okada, K. Noguchi and K. Chiba, *Angew. Chem. Int. Ed.*, 2019, **58**, 125.
